# Supplementary material for: Targeting hyperactive TGFBR2 for treating MYOCD deficient lung cancer
Source: PubMed Central journal article supplement (PMC8120205; doi:10.7150/thno.59816), 2021-05-03
Supplement: thnov11p6592s1.pdf [file thnov11p6592s1.pdf]

1 **Title:** Targeting hyperactive TGFBR2 for treating MYOCD deficient lung cancer

2 **Running Title:** TGFBR2 inhibition for MYOCD low NSCLC

3 Qian Zhou<sup>1\*#</sup>, Wensheng Chen<sup>1\*</sup>, Zhenzhen Fan<sup>1\*</sup>, Zhipeng Chen<sup>1\*</sup>, Jinxia Liang<sup>1\*</sup>, Guandi Zeng<sup>1</sup>,  
4 Lu Liu<sup>1</sup>, Wanting Liu<sup>1</sup>, Tong Yang<sup>1</sup>, Xin Cao<sup>2</sup>, Biao Yu<sup>3</sup>, Meng Xu<sup>4</sup>, Ye-Guang Chen<sup>5,6#</sup>, Liang  
5 Chen<sup>1#</sup>

6  
7 <sup>1</sup> MOE Key Laboratory of Tumor Molecular Biology and Key Laboratory of Functional Protein  
8 Research of Guangdong Higher Education Institutes, Institute of Life and Health Engineering,  
9 College of Life Science and Technology, Jinan University, Guangzhou 510632, China;

10 <sup>2</sup> Zhongshan Hospital, Institute of Clinical Science, Fudan University Shanghai Medical College,  
11 180 Fengling Road, Shanghai, 200032, China;

12 <sup>3</sup> State Key Laboratory of Bioorganic and Natural Products Chemistry, Center for Excellence in  
13 Molecular Synthesis, Shanghai, Institute of Organic Chemistry, University of Chinese Academy of  
14 Sciences, Chinese Academy of Sciences, 345 Lingling Road, Shanghai, 200032, China;

15 <sup>4</sup> Department of Oncology, The First Affiliated Hospital, Jinan University, Guangzhou 510632,  
16 China;

17 <sup>5</sup> The State Key Laboratory of Membrane Biology, Tsinghua-Peking Center for Life Sciences,  
18 School of Life Sciences, Tsinghua University, Beijing, China;

19 <sup>6</sup> Max-Planck Center for Tissue Stem Cell Research and Regenerative Medicine, Guangzhou  
20 Regenerative Medicine and Health Guangdong Laboratory, Guangzhou, China

21

22 \* These authors contributed equally to this work

23

24 # Corresponding Author:

25 Qian Zhou, Telephone: (086)-020-8522-6223, Email: zhouqian\_whu@163.com

26 Ye-Guang Chen, Telephone: (086)-010-6278-4794, Email: ygchen@tsinghua.edu.cn

27 Liang Chen, Telephone: (086)-020-8522-2875, Email: chenliang@jnu.edu.cn

28

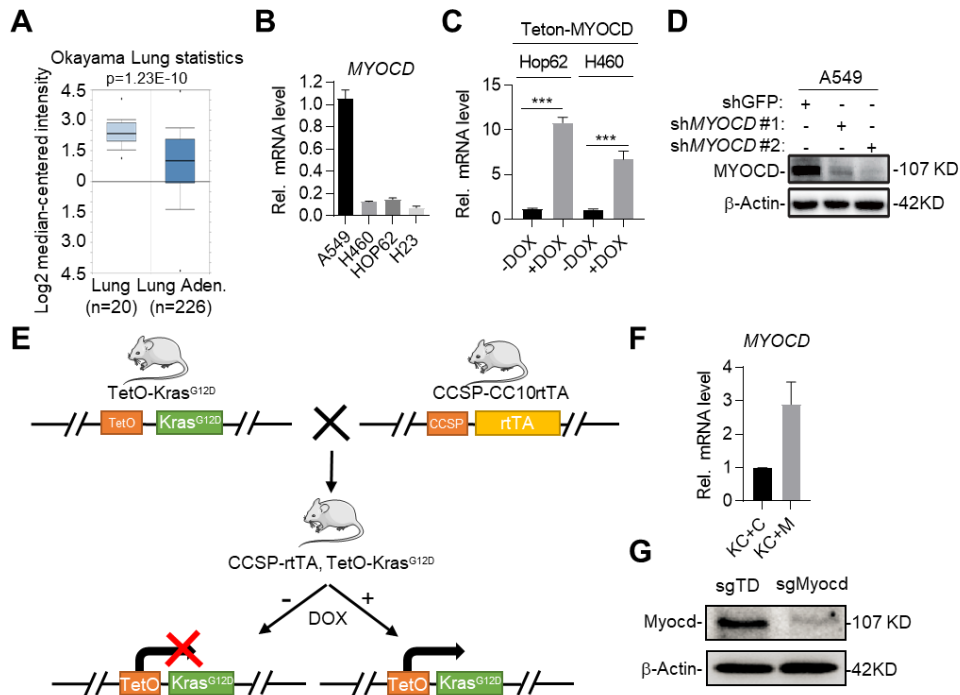

29 **Figure S1. MYOCD is an essential tumor suppressor in lung cancer**  
 30 (A) MYOCD mRNA expression in lung tissues and lung cancers from Oncomine  
 31 database. Lung cancer expression data of Okayama study was downloaded from  
 32 Oncomine and used for analysis. (B) MYOCD mRNA expression in the indicated lung  
 33 cancer cell lines. (C) Construct Hop62-Teton-MYOCD and H460-Teton-MYOCD  
 34 stable cell line. Hop62-Teton-MYOCD and H460-Teton-MYOCD cells were not  
 35 treated or treated with DOX for 2 days, total RNA was extracted to analysis the *MYOCD*  
 36 mRNA Level. (D) Knockdown of MYOCD in A549 cells. A549 cells were transfected  
 37 with shGFP or two independent MYOCD-shRNA plasmids (2  $\mu$ g). After 24 hours, cells  
 38 were selected with puromycin (1  $\mu$ g/ml) for 72 hours, WCL were analyzed by indicated  
 39 antibodies. (E) Schematic representations of *Kras*<sup>G12D</sup>/CC10rtTA (KC) mice. (F)  
 40 MYOCD expression level in lung of KC mice. Lung from KC+C mice or KC+M mice  
 41 was extracted RNA to analysis MYOCD mRNA expression after feeding DOX-diet for  
 42 48 hours. (G) MYOCD expression level in lung of *lsl-Kras*<sup>G12D</sup> transgenic mice.  
 43

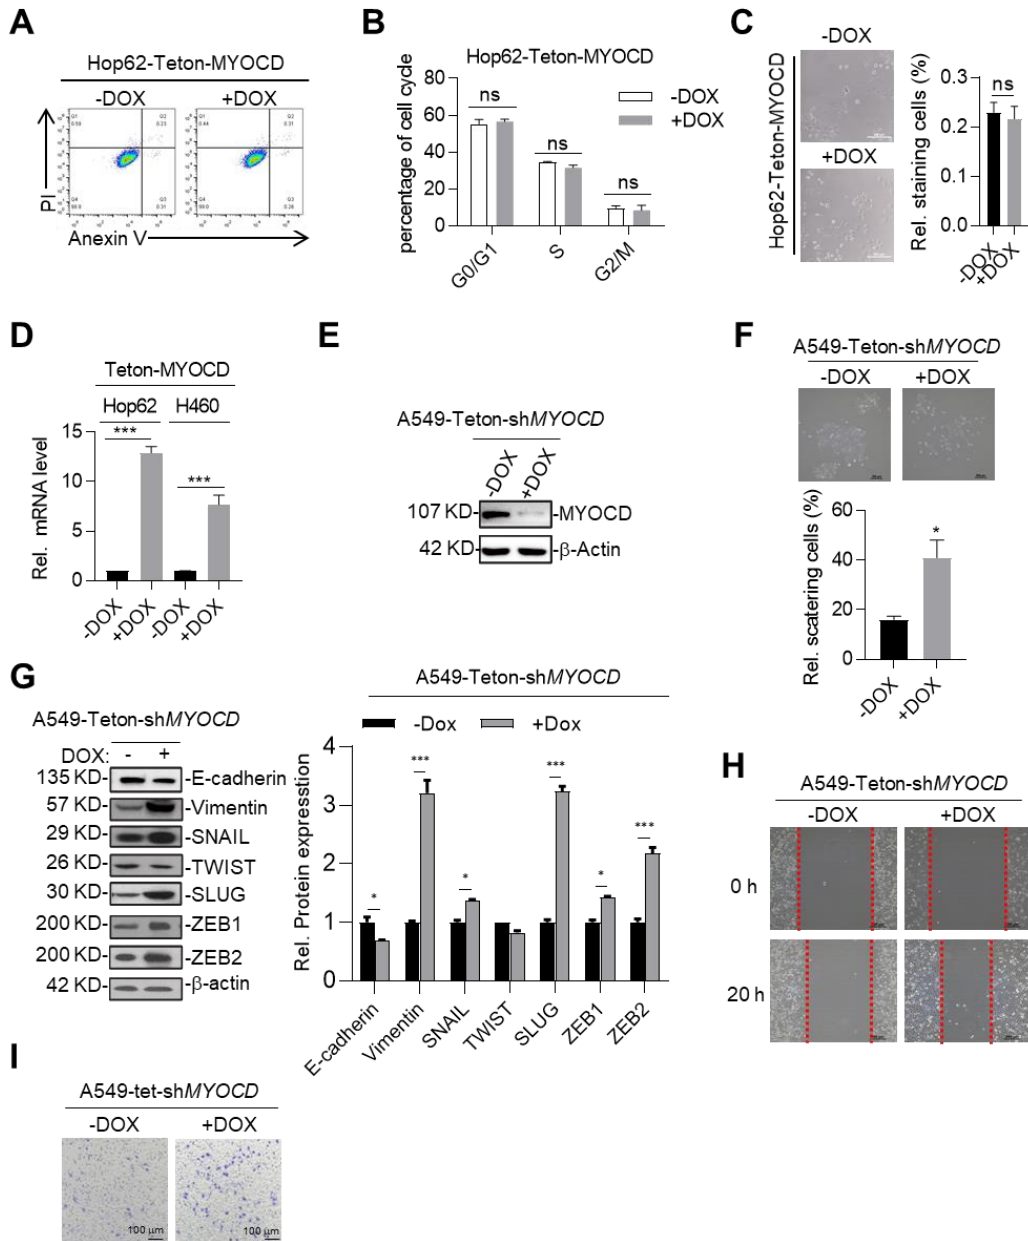

44 **Figure S2. MYOCD inhibits stemness of lung cancer cells**

45 (A) MYOCD did not affect the apoptosis of Hop62 cells. Hop62-Teton-MYOCD were  
 46 not treated or treated with DOX for 2 days before FACS assay. (B) MYOCD does not  
 47 affect cell cycle distribution in Hop62 cells. Hop62-Teton-MYOCD were not treated or  
 48 treated with DOX for 2 days before cell cycle analysis. (C) Representative image of  
 49 senescence-associated  $\beta$ -galactosidase staining. Hop62-Teton-MYOCD cells were  
 50 treated with or without DOX (1  $\mu$ g/mL) for 48 hours. (D) Generation of H460/Hop62-  
 51 Teton-MYOCD cell line. H460/Hop62-Teton-MYOCD cells were not treated or treated  
 52 with DOX for 2 days, total RNA was extracted to analysis the *MYOCD* mRNA Level.

53 (E) Effects of DOX induced expression of MYOCD in A549-Teton-sh*MYOCD* cell.  
54 A549-Teton-sh*MYOCD* cells were not treated or treated with DOX for 2 days, then  
55 WCL were analyzed by immunoblots with the indicated antibodies. (F) MYOCD  
56 knockdown leading to lung cancer cells scattering. Representative images of colonies  
57 of A549-Teton-sh*MYOCD* cells (upper panel) and statistic of scattering cells (lower  
58 panel). (G) Analysis of epithelial, mesenchymal markers and EMT drivers in A549 cells.  
59 The indicated cells were were not treated or treated with DOX for 2 days, WCL were  
60 analyzed by immunoblots with the indicated antibodies (left panel), right panel showed  
61 statistics analysis of relative protein expression. (H) In vitro migration assay in A549-  
62 Teton-sh*MYOCD* cells. A549-Teton-sh*MYOCD* cells were not treated or treated with  
63 DOX for 2 days, then cells were scratched. Images show wound size at time 0 h and 20  
64 h after scratch. (I) Transwell assays in A549-Teton-sh*MYOCD* cells. The migrated cells  
65 were stained and counted.  
66

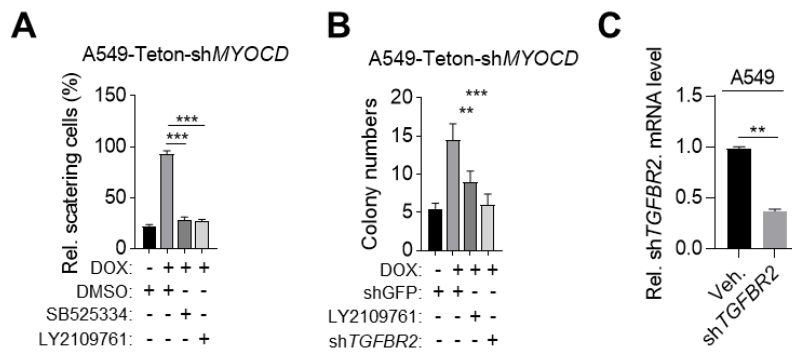

67 **Figure S3. MYOCD inhibits lung cancer stemness through suppressing TGFBR**  
 68 **signaling**

69 (A) MYOCD knockdown leading to lung cancer cells scattering was inhibited by TGF-  
 70  $\beta$  signaling inhibitors. A549-Teton-shMYOCD (200 cells) were not treated or treated  
 71 with DOX for 2 days, DMSO and TGF- $\beta$  signaling pathway inhibitors including  
 72 SB525334 (1  $\mu$ M) and LY2109761 (300 nM) were treated for the 10 days.  
 73 Quantification of scattering cells. (B) MYOCD inactivation mediated lung cancer cells  
 74 sphere formation was suppressed by LY2109761 and TGFBR2 shRNA. A549-Teton-  
 75 shMYOCD was infected or not infected with DOX-inducible TGFBR2 shRNA, then  
 76 cells were left untreated or treated with DOX, 48 hours later, DMSO and LY2109761  
 77 (300 nM) were treated for 10 days. Quantification of sphere numbers. (C) Effects of  
 78 DOX induced expression of TGFBR2 in A549-Teton-shTGFBR2 cell. RNA was  
 79 extracted from A549-Teton-MYOCD cells, which were not treated or treated with DOX  
 80 for 2 days. Expression of TGFBR2 was quantified through qPCR.

81

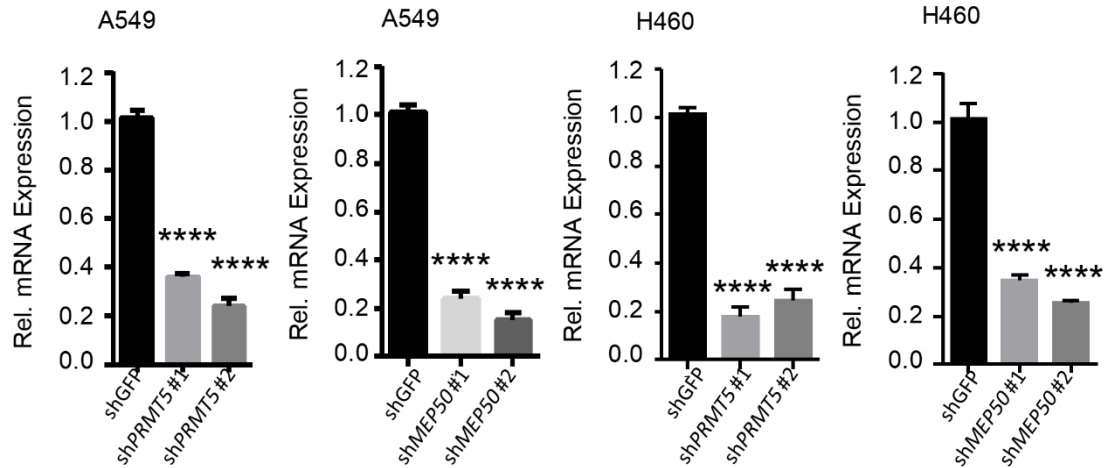

82

83 **Figure S4. Knockdown of PRMT5 or WDR77 in A549 and H460 cells.** A549 and  
 84 H460 cells were transfected with shGFP or two independent PRMT5/WDR77-shRNA  
 85 plasmids (2  $\mu$ g). 24 hours after, cells were selected with puromycin (1  $\mu$ g/ml) for 72 h,  
 86 qPCR were performed after puro selection. Data are presented as means  $\pm$  SD and error  
 87 bars denote SD; n=3; \*P < 0.05; \*\*P < 0.01; \*\*\*P < 0.001; \*\*\*\*P < 0.0001.

88

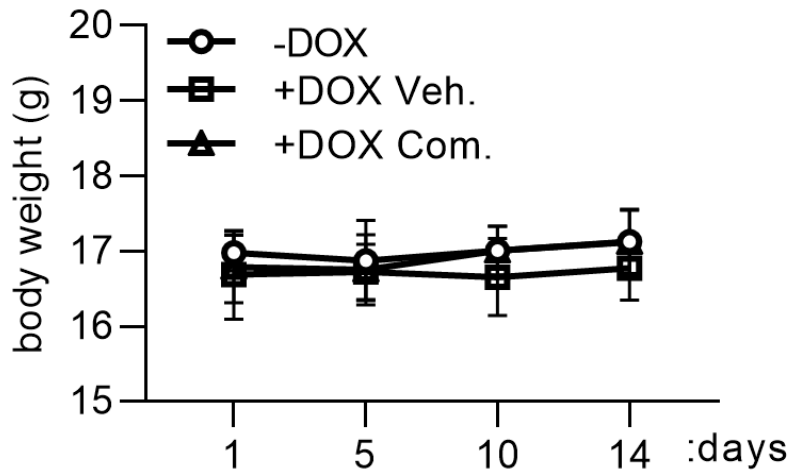

89 **Figure S5. MYOCD expression and combination therapy do not affect the body**  
 90 **weight of the mice.** A549-Teton-sh*MYOCD* cells ( $2 \times 10^6$ ) were implanted  
 91 subcutaneously into the flank of BALB/c nude mice. When the tumors reached a  
 92 volume of around  $100 \text{ mm}^3$ , animals were randomized into 9 groups (n = 6 per group  
 93 or n=3 per group), then mice received different treatment as indicated in Figure 6B for  
 94 around 14 days before sacrificed. Body weight of the mice (-DOX group, +DOX Veh.  
 95 group & +DOX Com. group) was recorded as indicated time points.

96 **Supplementary Materials and Methods**

97 **Generation of engineered cell lines**

98 The HEK293 cells were transfected with psPAX2 and pMD2.G and lentiviral  
99 plasmids respectively. After 24 hours, the cells were incubated with the new medium  
100 for another 24 hours. Filter the medium containing the recombinant virus and add it to  
101 the designated cells in the presence of polybrene (8 µg/ml). Before conducting other  
102 experiments, select infected cells with puromycin (1 µg/mL).

103 **Cell cycle analysis**

104 The cells were collected at 48 h after DOX treatment and fixed with 70% ethanol at  
105 -20°C overnight. According to the manufacturer's instructions, the cell cycle kit was  
106 used for cell cycle analysis. BD Accuri™ C6 flow cytometer was for FACS.

107 **Senescence associated β-galactosidase staining assay**

108 β-galactosidase staining was performed using the Cell Signaling Senescence β-  
109 Galactosidase Staining Kit according to manufacturer's instruction. In brief, 0.2 M  
110 indicated cells were cultured 6 well plates with different treatments before staining. For  
111 statistics of β-galactosidase staining positive cells, the blue positive cells were counted  
112 with ImageJ.

113 **Scratch wound healing assay**

114 Indicated cells were cultured in 56 well plate, when cells were around 100%  
115 confluent, a scratch was made across the plates using a pipette's tip. Cells were cultured  
116 and imaged as indicated time points to monitor the wound healing process.

117



Table 1:MYOCD expression in lung cancer cell Gene Expression-RNaseq

| GENE  | ID              | CELL LINE | CANCER TYPE | LOG2 (FPKM) | Source   |
|-------|-----------------|-----------|-------------|-------------|----------|
| MYOCD | ENSG00000141052 | SQ1       | Lung        | -2          | CCLC     |
| MYOCD | ENSG00000141052 | NCIH2085  | Lung        | -2          | CCLC     |
| MYOCD | ENSG00000141052 | NCI-H1869 | Lung        | -2          | CCLC     |
| MYOCD | ENSG00000141052 | DMS454    | Lung        | -2          | CCLC     |
| MYOCD | ENSG00000141052 | NCIH647   | Lung        | -2          | CCLC     |
| MYOCD | ENSG00000141052 | NCI-H1838 | Lung        | -2          | CCLC     |
| MYOCD | ENSG00000141052 | NCIH2196  | Lung        | -2          | CCLC     |
| MYOCD | ENSG00000141052 | NCI-H1703 | Lung        | -2          | CCLC     |
| MYOCD | ENSG00000141052 | NCIH2347  | Lung        | -2          | CCLC     |
| MYOCD | ENSG00000141052 | NCI-H2110 | Lung        | -2          | CCLC     |
| MYOCD | ENSG00000141052 | NCIH1341  | Lung        | -2          | CCLC     |
| MYOCD | ENSG00000141052 | HCC1195   | Lung        | -2          | CCLC     |
| MYOCD | ENSG00000141052 | BEN       | Lung        | -2          | CCLC     |
| MYOCD | ENSG00000141052 | NCI-H596  | Lung        | -2          | CCLC     |
| MYOCD | ENSG00000141052 | NCIH2444  | Lung        | -2          | CCLC     |
| MYOCD | ENSG00000141052 | NCI-H1299 | Lung        | -2          | CCLC     |
| MYOCD | ENSG00000141052 | NCI-H69   | Lung        | -2          | CCLC     |
| MYOCD | ENSG00000141052 | NCIH28    | Lung/Pleura | -2          | CCLC     |
| MYOCD | ENSG00000141052 | NCIH1755  | Lung        | -2          | CCLC     |
| MYOCD | ENSG00000141052 | NCI-H1395 | Lung        | -2          | CCLC     |
| MYOCD | ENSG00000141052 | EBC-1     | Lung        | -2          | CCLC     |
| MYOCD | ENSG00000141052 | NCI-H211  | Lung        | -2          | CCLC     |
| MYOCD | ENSG00000141052 | NCI-H1793 | Lung        | -2          | CCLC     |
| MYOCD | ENSG00000141052 | NCIH2029  | Lung        | -2          | CCLC     |
| MYOCD | ENSG00000141052 | PC14      | Lung        | -2          | CCLC     |
| MYOCD | ENSG00000141052 | HCC1171   | Lung        | -2          | CCLC     |
| MYOCD | ENSG00000141052 | NCI-H1648 | Lung        | -2          | CCLC     |
| MYOCD | ENSG00000141052 | HCC1588   | Lung        | -2          | CCLC     |
| MYOCD | ENSG00000141052 | HCC33     | Lung        | -2          | CCLC     |
| MYOCD | ENSG00000141052 | NCI-H522  | Lung        | -2          | CCLC     |
| MYOCD | ENSG00000141052 | NCI-H526  | Lung        | -2          | CCLC     |
| MYOCD | ENSG00000141052 | LU99      | Lung        | -2          | CCLC     |
| MYOCD | ENSG00000141052 | NCI-H2081 | Lung        | -2          | CCLC     |
| MYOCD | ENSG00000141052 | NCIH854   | Lung        | -2          | CCLC     |
| MYOCD | ENSG00000141052 | CORL279   | Lung        | -2          | CCLC     |
| MYOCD | ENSG00000141052 | NCIH1184  | Lung        | -2          | CCLC     |
| MYOCD | ENSG00000141052 | NCIH510   | Lung        | -2          | CCLC     |
| MYOCD | ENSG00000141052 | NCI-H2452 | Lung/Pleura | -2          | CCLC     |
| MYOCD | ENSG00000141052 | NCIH1694  | Lung        | -2          | CCLC     |
| MYOCD | ENSG00000141052 | COL0668   | Lung        | -2          | CCLC     |
| MYOCD | ENSG00000141052 | CORL105   | Lung        | -2          | CCLC     |
| MYOCD | ENSG00000141052 | NCI-H1105 | Lung        | -2          | CCLC     |
| MYOCD | ENSG00000141052 | COR-L23   | Lung        | -2          | CCLC     |
| MYOCD | ENSG00000141052 | DMS 53    | Lung        | -2          | CCLC     |
| MYOCD | ENSG00000141052 | NCI-H1666 | Lung        | -2          | CCLC     |
| MYOCD | ENSG00000141052 | A-427     | Lung        | -2          | Crownbio |
| MYOCD | ENSG00000141052 | NCI-H2009 | Lung        | -2          | CCLC     |
| MYOCD | ENSG00000141052 | NCI-H2227 | Lung        | -2          | CCLC     |

|       |                 |            |             |    |          |
|-------|-----------------|------------|-------------|----|----------|
| MYOCD | ENSG00000141052 | NCI-H889   | Lung        | -2 | CCLC     |
| MYOCD | ENSG00000141052 | DMS 79     | Lung        | -2 | CCLC     |
| MYOCD | ENSG00000141052 | NCI-H1792  | Lung        | -2 | CCLC     |
| MYOCD | ENSG00000141052 | DV-90      | Lung        | -2 | CCLC     |
| MYOCD | ENSG00000141052 | NCI-H146   | Lung        | -2 | CCLC     |
| MYOCD | ENSG00000141052 | NCI-H1688  | Lung        | -2 | Crownbio |
| MYOCD | ENSG00000141052 | NCI-H810   | Lung        | -2 | CCLC     |
| MYOCD | ENSG00000141052 | NCI-H2122  | Lung        | -2 | CCLC     |
| MYOCD | ENSG00000141052 | CAL12T     | Lung        | -2 | CCLC     |
| MYOCD | ENSG00000141052 | ABC1       | Lung        | -2 | CCLC     |
| MYOCD | ENSG00000141052 | NCIH2106   | Lung        | -2 | CCLC     |
| MYOCD | ENSG00000141052 | NCI-H226   | Lung/Pleura | -2 | CCLC     |
| MYOCD | ENSG00000141052 | MsTo 211H  | Lung/Pleura | -2 | CCLC     |
| MYOCD | ENSG00000141052 | LK-2       | Lung        | -2 | CCLC     |
| MYOCD | ENSG00000141052 | HCC1833    | Lung        | -2 | CCLC     |
| MYOCD | ENSG00000141052 | LCLC-97TM1 | Lung        | -2 | CCLC     |
| MYOCD | ENSG00000141052 | NCI-H1437  | Lung        | -2 | CCLC     |
| MYOCD | ENSG00000141052 | LU65       | Lung        | -2 | CCLC     |
| MYOCD | ENSG00000141052 | NCIH2171   | Lung        | -2 | CCLC     |
| MYOCD | ENSG00000141052 | NCI-H1963  | Lung        | -2 | CCLC     |
| MYOCD | ENSG00000141052 | SK-LU-1    | Lung        | -2 | CCLC     |
| MYOCD | ENSG00000141052 | NCI-H1435  | Lung        | -2 | Crownbio |
| MYOCD | ENSG00000141052 | ACCMES01   | Lung/Pleura | -2 | CCLC     |
| MYOCD | ENSG00000141052 | KNS62      | Lung        | -2 | CCLC     |
| MYOCD | ENSG00000141052 | NCI-H1435  | Lung        | -2 | CCLC     |
| MYOCD | ENSG00000141052 | T3M10      | Lung        | -2 | CCLC     |
| MYOCD | ENSG00000141052 | NCI-H69    | Lung        | -2 | Crownbio |
| MYOCD | ENSG00000141052 | LUDLU1     | Lung        | -2 | CCLC     |
| MYOCD | ENSG00000141052 | NCI-H2066  | Lung        | -2 | CCLC     |
| MYOCD | ENSG00000141052 | PC-9       | Lung        | -2 | Crownbio |
| MYOCD | ENSG00000141052 | NCI-H1993  | Lung        | -2 | Crownbio |
| MYOCD | ENSG00000141052 | NCI-H226   | Lung/Pleura | -2 | Crownbio |
| MYOCD | ENSG00000141052 | SW1573     | Lung        | -2 | CCLC     |
| MYOCD | ENSG00000141052 | NCI-H1650  | Lung        | -2 | Crownbio |
| MYOCD | ENSG00000141052 | SHP-77     | Lung        | -2 | Crownbio |
| MYOCD | ENSG00000141052 | NCI-H522   | Lung        | -2 | Crownbio |
| MYOCD | ENSG00000141052 | NCI-H2228  | Lung        | -2 | Crownbio |
| MYOCD | ENSG00000141052 | NCI-H838   | Lung        | -2 | CCLC     |
| MYOCD | ENSG00000141052 | NCI-H1666  | Lung        | -2 | Crownbio |
| MYOCD | ENSG00000141052 | NCI-H1975  | Lung        | -2 | Crownbio |
| MYOCD | ENSG00000141052 | NCI-H2087  | Lung        | -2 | CCLC     |
| MYOCD | ENSG00000141052 | HCC827     | Lung        | -2 | Crownbio |
| MYOCD | ENSG00000141052 | HCC4006    | Lung        | -2 | Crownbio |
| MYOCD | ENSG00000141052 | NCI-H1395  | Lung        | -2 | Crownbio |
| MYOCD | ENSG00000141052 | HCC2935    | Lung        | -2 | Crownbio |
| MYOCD | ENSG00000141052 | NCI-H1417  | Lung        | -2 | Crownbio |
| MYOCD | ENSG00000141052 | SBC5       | Lung        | -2 | CCLC     |
| MYOCD | ENSG00000141052 | HCC44      | Lung        | -2 | CCLC     |
| MYOCD | ENSG00000141052 | IALM       | Lung        | -2 | CCLC     |
| MYOCD | ENSG00000141052 | RERFLCAD2  | Lung        | -2 | CCLC     |

|       |                 |           |             |    |          |
|-------|-----------------|-----------|-------------|----|----------|
| MYOCD | ENSG00000141052 | NCI-H1568 | Lung        | -2 | CCLC     |
| MYOCD | ENSG00000141052 | EBC-1     | Lung        | -2 | Crownbio |
| MYOCD | ENSG00000141052 | Calu-1    | Lung        | -2 | CCLC     |
| MYOCD | ENSG00000141052 | SK-MES-1  | Lung        | -2 | CCLC     |
| MYOCD | ENSG00000141052 | JL1       | Lung/Pleura | -2 | CCLC     |
| MYOCD | ENSG00000141052 | NCI-H2073 | Lung        | -2 | CCLC     |
| MYOCD | ENSG00000141052 | HCC2279   | Lung        | -2 | CCLC     |
| MYOCD | ENSG00000141052 | NCI-H209  | Lung        | -2 | CCLC     |
| MYOCD | ENSG00000141052 | NCI-H1650 | Lung        | -2 | CCLC     |
| MYOCD | ENSG00000141052 | NCI-H446  | Lung        | -2 | Crownbio |
| MYOCD | ENSG00000141052 | DMS 53    | Lung        | -2 | Crownbio |
| MYOCD | ENSG00000141052 | NCI-H441  | Lung        | -2 | CCLC     |
| MYOCD | ENSG00000141052 | NCI-H322  | Lung        | -2 | CCLC     |
| MYOCD | ENSG00000141052 | NCI-H460  | Lung        | -2 | CCLC     |
| MYOCD | ENSG00000141052 | NCIH1734  | Lung        | -2 | CCLC     |
| MYOCD | ENSG00000141052 | NCI-H358  | Lung        | -2 | CCLC     |
| MYOCD | ENSG00000141052 | SW1271    | Lung        | -2 | CCLC     |
| MYOCD | ENSG00000141052 | NCI-H1155 | Lung        | -2 | CCLC     |
| MYOCD | ENSG00000141052 | NCI-H1975 | Lung        | -2 | CCLC     |
| MYOCD | ENSG00000141052 | NCI-H841  | Lung        | -2 | CCLC     |
| MYOCD | ENSG00000141052 | NCI-H82   | Lung        | -2 | CCLC     |
| MYOCD | ENSG00000141052 | NCIH2291  | Lung        | -2 | CCLC     |
| MYOCD | ENSG00000141052 | SCLC21H   | Lung        | -2 | CCLC     |
| MYOCD | ENSG00000141052 | NCIH196   | Lung        | -2 | CCLC     |
| MYOCD | ENSG00000141052 | HCC827    | Lung        | -2 | CCLC     |
| MYOCD | ENSG00000141052 | NCIH650   | Lung        | -2 | CCLC     |
| MYOCD | ENSG00000141052 | NCIH524   | Lung        | -2 | CCLC     |
| MYOCD | ENSG00000141052 | LC1F      | Lung        | -2 | CCLC     |
| MYOCD | ENSG00000141052 | HCC2108   | Lung        | -2 | CCLC     |
| MYOCD | ENSG00000141052 | HCC1359   | Lung        | -2 | CCLC     |
| MYOCD | ENSG00000141052 | NCI-H460  | Lung        | -2 | Crownbio |
| MYOCD | ENSG00000141052 | HOP92     | Lung        | -2 | CCLC     |
| MYOCD | ENSG00000141052 | HARA      | Lung        | -2 | CCLC     |
| MYOCD | ENSG00000141052 | SW900     | Lung        | -2 | CCLC     |
| MYOCD | ENSG00000141052 | NCI-H1573 | Lung        | -2 | CCLC     |
| MYOCD | ENSG00000141052 | NCIH1092  | Lung        | -2 | CCLC     |
| MYOCD | ENSG00000141052 | NCI-H2009 | Lung        | -2 | Crownbio |
| MYOCD | ENSG00000141052 | DMS 153   | Lung        | -2 | CCLC     |
| MYOCD | ENSG00000141052 | NCI-H292  | Lung        | -2 | CCLC     |
| MYOCD | ENSG00000141052 | LCLC-103H | Lung        | -2 | CCLC     |
| MYOCD | ENSG00000141052 | NCI-H2228 | Lung        | -2 | CCLC     |
| MYOCD | ENSG00000141052 | CORL95    | Lung        | -2 | CCLC     |
| MYOCD | ENSG00000141052 | NCIH1693  | Lung        | -2 | CCLC     |
| MYOCD | ENSG00000141052 | CORL311   | Lung        | -2 | CCLC     |
| MYOCD | ENSG00000141052 | HCC2935   | Lung        | -2 | CCLC     |
| MYOCD | ENSG00000141052 | Calu-3    | Lung        | -2 | CCLC     |
| MYOCD | ENSG00000141052 | NCI-H820  | Lung        | -2 | Crownbio |
| MYOCD | ENSG00000141052 | NCI-H1581 | Lung        | -2 | CCLC     |
| MYOCD | ENSG00000141052 | NCIH1339  | Lung        | -2 | CCLC     |
| MYOCD | ENSG00000141052 | RERFLCAD1 | Lung        | -2 | CCLC     |

|       |                 |           |             |         |          |
|-------|-----------------|-----------|-------------|---------|----------|
| MYOCD | ENSG00000141052 | CORL47    | Lung        | -2      | CCLC     |
| MYOCD | ENSG00000141052 | NCI-H446  | Lung        | -2      | CCLC     |
| MYOCD | ENSG00000141052 | SNU-2535  | Lung        | -2      | Crownbio |
| MYOCD | ENSG00000141052 | NCI-H1563 | Lung        | -2      | CCLC     |
| MYOCD | ENSG00000141052 | NCI-H3255 | Lung        | -2      | CCLC     |
| MYOCD | ENSG00000141052 | HCC-78    | Lung        | -2      | CCLC     |
| MYOCD | ENSG00000141052 | NCIH1385  | Lung        | -2      | CCLC     |
| MYOCD | ENSG00000141052 | NCI-H1876 | Lung        | -2      | CCLC     |
| MYOCD | ENSG00000141052 | HCC1438   | Lung        | -2      | CCLC     |
| MYOCD | ENSG00000141052 | HOP62     | Lung        | -2      | CCLC     |
| MYOCD | ENSG00000141052 | NCI-H1573 | Lung        | -2      | Crownbio |
| MYOCD | ENSG00000141052 | NCI-H1781 | Lung        | -2      | CCLC     |
| MYOCD | ENSG00000141052 | HCC95     | Lung        | -2      | CCLC     |
| MYOCD | ENSG00000141052 | NCIH2342  | Lung        | -2      | CCLC     |
| MYOCD | ENSG00000141052 | NCI-H82   | Lung        | -2      | Crownbio |
| MYOCD | ENSG00000141052 | ISTMES2   | Lung/Pleura | -2      | CCLC     |
| MYOCD | ENSG00000141052 | SHP-77    | Lung        | -2      | CCLC     |
| MYOCD | ENSG00000141052 | NCI-H2052 | Lung/Pleura | -2      | CCLC     |
| MYOCD | ENSG00000141052 | NCI-H1048 | Lung        | -2      | CCLC     |
| MYOCD | ENSG00000141052 | RERFLCKJ  | Lung        | -2      | CCLC     |
| MYOCD | ENSG00000141052 | NCI-H2052 | Lung/Pleura | -2      | Crownbio |
| MYOCD | ENSG00000141052 | CHAGOK1   | Lung        | -2      | CCLC     |
| MYOCD | ENSG00000141052 | NCIH1618  | Lung        | -2      | CCLC     |
| MYOCD | ENSG00000141052 | CORL24    | Lung        | -2      | CCLC     |
| MYOCD | ENSG00000141052 | HCC4006   | Lung        | -2      | CCLC     |
| MYOCD | ENSG00000141052 | Calu-3    | Lung        | -2      | Crownbio |
| MYOCD | ENSG00000141052 | NCI-H520  | Lung        | -2      | CCLC     |
| MYOCD | ENSG00000141052 | H69AR     | Lung        | -2      | Crownbio |
| MYOCD | ENSG00000141052 | HCC-15    | Lung        | -2      | CCLC     |
| MYOCD | ENSG00000141052 | DMS 114   | Lung        | -2      | CCLC     |
| MYOCD | ENSG00000141052 | HCC366    | Lung        | -2      | CCLC     |
| MYOCD | ENSG00000141052 | Calu-6    | Lung        | -2      | CCLC     |
| MYOCD | ENSG00000141052 | DMS 114   | Lung        | -2      | Crownbio |
| MYOCD | ENSG00000141052 | ISTMES1   | Lung/Pleura | -2      | CCLC     |
| MYOCD | ENSG00000141052 | NCI-H2286 | Lung        | -2      | CCLC     |
| MYOCD | ENSG00000141052 | SK-MES-1  | Lung        | -2      | Crownbio |
| MYOCD | ENSG00000141052 | NCIH1436  | Lung        | -2      | CCLC     |
| MYOCD | ENSG00000141052 | RERFLCAI  | Lung        | -2      | CCLC     |
| MYOCD | ENSG00000141052 | NCI-H727  | Lung        | -2      | CCLC     |
| MYOCD | ENSG00000141052 | NCIH1930  | Lung        | -2      | CCLC     |
| MYOCD | ENSG00000141052 | NCI-H1563 | Lung        | -2      | Crownbio |
| MYOCD | ENSG00000141052 | RERFLCSQ1 | Lung        | -2      | CCLC     |
| MYOCD | ENSG00000141052 | NCI-H2170 | Lung        | -2      | CCLC     |
| MYOCD | ENSG00000141052 | Hs 618. T | Lung        | -1.8157 | CCLC     |
| MYOCD | ENSG00000141052 | CORL88    | Lung        | -1.7936 | CCLC     |
| MYOCD | ENSG00000141052 | MPP89     | Lung/Pleura | -1.7752 | CCLC     |
| MYOCD | ENSG00000141052 | LOU-NH91  | Lung        | -1.5422 | CCLC     |
| MYOCD | ENSG00000141052 | NCI-H2126 | Lung        | -1.4774 | CCLC     |
| MYOCD | ENSG00000141052 | MORCPR    | Lung        | -1.4614 | CCLC     |
| MYOCD | ENSG00000141052 | NCI-H661  | Lung        | -1.3092 | CCLC     |

|       |                 |           |             |         |          |
|-------|-----------------|-----------|-------------|---------|----------|
| MYOCD | ENSG00000141052 | NCIH2405  | Lung        | -1.2953 | CCLC     |
| MYOCD | ENSG00000141052 | LXF289    | Lung        | -1.2484 | CCLC     |
| MYOCD | ENSG00000141052 | RERFLCMS  | Lung        | -1.1768 | CCLC     |
| MYOCD | ENSG00000141052 | NCI-H23   | Lung        | -0.571  | CCLC     |
| MYOCD | ENSG00000141052 | NCIH1623  | Lung        | -0.5646 | CCLC     |
| MYOCD | ENSG00000141052 | NCI-H1915 | Lung        | -0.5468 | CCLC     |
| MYOCD | ENSG00000141052 | NCIH2023  | Lung        | -0.5424 | CCLC     |
| MYOCD | ENSG00000141052 | NCI-H1651 | Lung        | -0.5087 | CCLC     |
| MYOCD | ENSG00000141052 | NCI-H1355 | Lung        | -0.2942 | CCLC     |
| MYOCD | ENSG00000141052 | DM3       | Lung/Pleura | 0.0856  | CCLC     |
| MYOCD | ENSG00000141052 | NCI-H1944 | Lung        | 0.6655  | CCLC     |
| MYOCD | ENSG00000141052 | HS229T    | Lung        | 0.6761  | CCLC     |
| MYOCD | ENSG00000141052 | HLFA      | Lung        | 0.7521  | CCLC     |
| MYOCD | ENSG00000141052 | DMS273    | Lung        | 0.8674  | CCLC     |
| MYOCD | ENSG00000141052 | NCI-H23   | Lung        | 0.8939  | Crownbio |
| MYOCD | ENSG00000141052 | NCI-H2172 | Lung        | 0.8988  | CCLC     |
| MYOCD | ENSG00000141052 | A549      | Lung        | 0.9331  | Crownbio |
| MYOCD | ENSG00000141052 | EPLC272H  | Lung        | 1.174   | CCLC     |
| MYOCD | ENSG00000141052 | RS5       | Lung/Pleura | 1.4677  | CCLC     |
| MYOCD | ENSG00000141052 | NCIH2030  | Lung        | 1.5998  | CCLC     |
| MYOCD | ENSG00000141052 | EKVX      | Lung        | 2.0817  | CCLC     |
| MYOCD | ENSG00000141052 | A549      | Lung        | 2.5044  | CCLC     |
| MYOCD | ENSG00000141052 | NCI-H1651 | Lung        | 2.5385  | Crownbio |

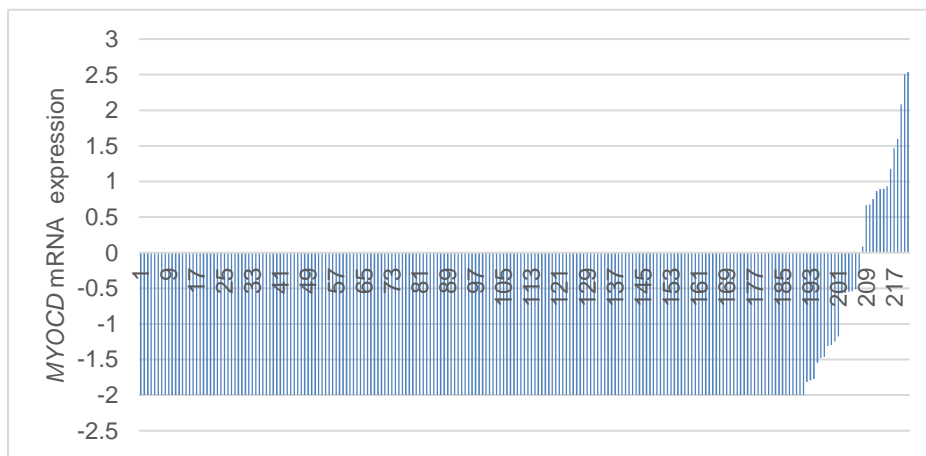

Table 2: IP-MS analysis of MYOCD associated protein partners.

| Sample ID | Accession number | Protein description                                                              | Mascot score | MW     | Matched queries | Matched peptides |
|-----------|------------------|----------------------------------------------------------------------------------|--------------|--------|-----------------|------------------|
| GFP       | IPI00743194      | - Kappa light chain variable region (Fragment)                                   | 470          | 13174  | 36              | 2                |
|           | IPI00304925      | HSPA1B;HSPA1A Heat shock 70 kDa protein 1A/1B                                    | 302          | 70009  | 14              | 10               |
|           | IPI00418471      | VIM Vimentin                                                                     | 278          | 53619  | 13              | 13               |
|           | IPI00179330      | RPS27A Ubiquitin-40S ribosomal protein S27a                                      | 256          | 17953  | 8               | 3                |
|           | IPI00003865      | HSPA8 Isoform 1 of Heat shock cognate 71 kDa protein                             | 238          | 70854  | 10              | 9                |
|           | IPI00829827      | - 13 kDa protein                                                                 | 231          | 13071  | 25              | 4                |
|           | IPI00021439      | ACTB Actin, cytoplasmic 1                                                        | 195          | 41710  | 7               | 5                |
|           | IPI00453473      | HIST2H4B;HIST1H4C;HIST1H4J;HIST1H4D;HIST1H4A;HIST2H4A;HIST1H4I;HIST1H4K;HIST1H4L | 184          | 11360  | 8               | 3                |
|           | IPI00013296      | RPS18;RPS18P9 40S ribosomal protein S18                                          | 177          | 17708  | 8               | 6                |
|           | IPI00645452      | TUBB Uncharacterized protein                                                     | 148          | 47736  | 8               | 6                |
|           | IPI00013881      | HNRNPH1 Heterogeneous nuclear ribonucleoprotein H                                | 142          | 49198  | 2               | 2                |
|           | IPI00020729      | IRS4 Insulin receptor substrate 4                                                | 128          | 133685 | 2               | 1                |
|           | IPI00180675      | TUBA1A Tubulin alpha-1A chain                                                    | 127          | 50104  | 6               | 5                |
|           | IPI00007752      | TUBB2C Tubulin beta-2C chain                                                     | 124          | 49799  | 8               | 6                |
|           | IPI00022434      | ALB Uncharacterized protein                                                      | 118          | 71658  | 5               | 3                |
|           | IPI00376798      | RPL11 Isoform 1 of 60S ribosomal protein L11                                     | 117          | 20240  | 2               | 1                |
|           | IPI00021263      | YWHAZ 14-3-3 protein zeta/delta                                                  | 114          | 27728  | 3               | 2                |
|           | IPI00018146      | YWHAQ 14-3-3 protein theta                                                       | 105          | 27747  | 2               | 2                |
|           | IPI00007188      | SLC25A5 ADP/ATP translocase 2                                                    | 104          | 32831  | 6               | 5                |
|           | IPI00007765      | HSPA9 Stress-70 protein, mitochondrial                                           | 102          | 73635  | 2               | 2                |
|           | IPI00216049      | HNRNPK Isoform 1 of Heterogeneous nuclear ribonucleoprotein K                    | 101          | 50944  | 4               | 3                |
|           | IPI00000959      | VIP Isoform 1 of VIP peptides                                                    | 100          | 19157  | 4               | 1                |
|           | IPI00396378      | HNRNPA2B1 Isoform B1 of Heterogeneous nuclear ribonucleoproteins A2/B1           | 96           | 37407  | 4               | 3                |
|           | IPI00449049      | PARP1 Poly [ADP-ribose] polymerase 1                                             | 93           | 113012 | 4               | 4                |
|           | IPI00395474      | SAMD1 Atherin                                                                    | 88           | 56018  | 1               | 1                |
|           | IPI00002214      | KPNA2 Importin subunit alpha-2                                                   | 85           | 57826  | 1               | 1                |
|           | IPI00003935      | HIST2H2BE Histone H2B type 2-E                                                   | 79           | 13912  | 8               | 5                |
|           | IPI00847768      | DDX17 Uncharacterized protein                                                    | 76           | 19189  | 1               | 1                |
|           | IPI00216592      | HNRNPC Isoform C1 of Heterogeneous nuclear ribonucleoproteins C1/C2              | 75           | 32318  | 3               | 2                |
|           | IPI00410693      | SERPBI SERPINE1 mRNA binding protein 1, isoform CRA_d                            | 75           | 50890  | 2               | 2                |
|           | IPI00651653      | DDX17 probable ATP-dependent RNA helicase DDX17 isoform 3                        | 72           | 80407  | 2               | 2                |
|           | IPI00012493      | SNORD54;RPS20 40S ribosomal protein S20                                          | 70           | 13364  | 2               | 2                |
|           | IPI00009379      | IGHMBP2 DNA-binding protein SMUBP-2                                              | 67           | 109082 | 2               | 1                |
|           | IPI00157561      | TAB2 Isoform 2 of TGF-beta-activated kinase 1 and MAP3K7-binding protein 2       | 65           | 58095  | 1               | 1                |
|           | IPI00171611      | HIST2H3D;HIST2H3A;HIST2H3C Histone H3.2                                          | 63           | 15379  | 5               | 4                |
|           | IPI00305289      | KIF11 Kinesin-like protein KIF11                                                 | 61           | 119085 | 6               | 6                |
|           | IPI00788837      | PCBP2 cDNA FLJ54752, highly similar to Poly(rC)-binding protein 2                | 61           | 29718  | 1               | 1                |
|           | IPI00012066      | PCBP2 poly(rC)-binding protein 2 isoform b                                       | 60           | 38197  | 2               | 2                |
|           | IPI00032314      | LAGE3 L antigen family member 3                                                  | 59           | 14795  | 1               | 1                |
|           | IPI00218993      | HSPH1 Isoform Beta of Heat shock protein 105 kDa                                 | 58           | 92057  | 2               | 2                |
|           | IPI00304692      | RBMX Heterogeneous nuclear ribonucleoprotein G                                   | 58           | 42306  | 2               | 2                |
|           | IPI00171903      | HNRNPM Isoform 1 of Heterogeneous nuclear ribonucleoprotein M                    | 58           | 77464  | 2               | 2                |
|           | IPI00095891      | GNAS Isoform XLas-1 of Guanine nucleotide-binding protein G(s) subunit alpha i   | 57           | 110956 | 1               | 1                |
|           | IPI00044665      | FAM117B Isoform 2 of Protein FAM117B                                             | 56           | 29410  | 1               | 1                |
|           | IPI00106509      | HNRNPAB Isoform 4 of Heterogeneous nuclear ribonucleoprotein A/B                 | 54           | 30682  | 1               | 1                |
|           | IPI00027107      | TUFM elongation factor Tu, mitochondrial precursor                               | 53           | 49843  | 1               | 1                |
|           | IPI00939612      | SLC22A20 Similar to Solute carrier family 22, member 20                          | 53           | 13446  | 6               | 1                |
|           | IPI00438229      | TRIM28 Isoform 1 of Transcription intermediary factor 1-beta                     | 52           | 88493  | 1               | 1                |
|           | IPI00301434      | BOLA2B;BOLA2 BOLA-like protein 2                                                 | 49           | 16922  | 1               | 1                |
|           | IPI00217465      | HIST1H1C Histone H1.2                                                            | 48           | 21352  | 3               | 3                |
|           | IPI00215965      | HNRNPA1 Isoform A1-B of Heterogeneous nuclear ribonucleoprotein A1               | 47           | 38723  | 2               | 2                |
|           | IPI00009542      | MAGED2 Isoform 1 of Melanoma-associated antigen D2                               | 46           | 64914  | 1               | 1                |
|           | IPI00221089      | RPS13 40S ribosomal protein S13                                                  | 45           | 17212  | 1               | 1                |
|           | IPI00014424      | EEF1A2 Elongation factor 1-alpha 2                                               | 42           | 50438  | 1               | 1                |
|           | IPI00024933      | RPL12 Isoform 1 of 60S ribosomal protein L12                                     | 41           | 17808  | 2               | 2                |
|           | IPI00011253      | RPS3 40S ribosomal protein S3                                                    | 41           | 26671  | 3               | 2                |
|           | IPI00216870      | IL16 Uncharacterized protein                                                     | 40           | 48362  | 1               | 1                |
|           | IPI00012772      | RPL8 60S ribosomal protein L8                                                    | 40           | 28007  | 1               | 1                |
|           | IPI00022228      | HDLBP Vigilin                                                                    | 40           | 141368 | 1               | 1                |
|           | IPI00470559      | KANK2 Isoform 1 of KN motif and ankyrin repeat domain-containing protein 2       | 38           | 91118  | 1               | 1                |
|           | IPI00915941      | HSPD1 Uncharacterized protein                                                    | 38           | 25210  | 1               | 1                |
|           | IPI00306332      | RPL24 60S ribosomal protein L24                                                  | 37           | 17768  | 1               | 1                |
|           | IPI00290791      | CASP10 Isoform A of Caspase-10                                                   | 36           | 58913  | 1               | 1                |
|           | IPI00022432      | TTR Transthyretin                                                                | 35           | 15877  | 1               | 1                |
|           | IPI00291510      | IMPDH2 Inosine-5'-monophosphate dehydrogenase 2                                  | 35           | 55770  | 1               | 1                |
|           | IPI00465439      | ALDOA Fructose-bisphosphate aldolase A                                           | 34           | 39395  | 1               | 1                |
|           | IPI00784154      | HSPD1 60 kDa heat shock protein, mitochondrial                                   | 34           | 61016  | 2               | 2                |
|           | IPI00871311      | ZYX cDNA FLJ53160, highly similar to Zyxin                                       | 34           | 51995  | 2               | 2                |
|           | IPI00032003      | EMD Emerin                                                                       | 34           | 28976  | 2               | 2                |
|           | IPI00217030      | RPS4X 40S ribosomal protein S4, X isoform                                        | 33           | 29579  | 1               | 1                |
|           | IPI00930144      | H2AFJ Histone H2A                                                                | 33           | 12114  | 1               | 1                |
|           | IPI01025580      | - Possible J 56 gene segment (Fragment)                                          | 33           | 2212   | 5               | 1                |
|           | IPI00018262      | ANP32C Acidic leucine-rich nuclear phosphoprotein 32 family member C             | 33           | 26746  | 1               | 1                |
|           | IPI00000001      | STAU1 Isoform Long of Double-stranded RNA-binding protein Staufen homolog 1      | 33           | 63143  | 1               | 1                |
|           | IPI00220740      | NPM1 Isoform 2 of Nucleophosmin                                                  | 33           | 29446  | 1               | 1                |
|           | IPI00045109      | HIST1H2AA Histone H2A type 1-A                                                   | 32           | 14225  | 2               | 2                |
|           | IPI00013485      | RPS2 40S ribosomal protein S2                                                    | 32           | 31305  | 1               | 1                |

|             |                                                                                       |     |        |    |    |
|-------------|---------------------------------------------------------------------------------------|-----|--------|----|----|
| IPI00215637 | DDX3X ATP-dependent RNA helicase DDX3X                                                | 30  | 73198  | 2  | 2  |
| IPI00031820 | FARSA Phenylalanyl-tRNA synthetase alpha chain                                        | 30  | 57528  | 1  | 1  |
| IPI00023048 | EEF1D Isoform 1 of Elongation factor 1-delta                                          | 30  | 31103  | 1  | 1  |
| IPI00004065 | ART4 Ecto-ADP-ribosyltransferase 4                                                    | 30  | 35854  | 1  | 1  |
| IPI00009631 | ST3GAL4 Isoform 1 of CMP-N-acetylneuraminase-beta-galactosamide-alpha-2,3-sial        | 30  | 38021  | 1  | 1  |
| IPI00102918 | ATRIP Isoform 2 of ATR-interacting protein                                            | 29  | 82951  | 1  | 1  |
| IPI00217541 | DDX51 ATP-dependent RNA helicase DDX51                                                | 29  | 72413  | 2  | 1  |
| IPI00030131 | TMPO Isoform Beta of Lamina-associated polypeptide 2, isoforms beta/gamma             | 28  | 50639  | 1  | 1  |
| IPI00015180 | SHROOM2 Protein Shroom2                                                               | 28  | 176303 | 1  | 1  |
| IPI00021840 | RPS6 40S ribosomal protein S6                                                         | 27  | 28663  | 1  | 1  |
| IPI00008529 | RPLP2 60S acidic ribosomal protein P2                                                 | 27  | 11658  | 2  | 1  |
| IPI00000643 | BAG2 BAG family molecular chaperone regulator 2                                       | 27  | 23757  | 1  | 1  |
| IPI00008530 | RPLP0 60S acidic ribosomal protein P0                                                 | 27  | 34252  | 1  | 1  |
| IPI00011200 | PHGDH D-3-phosphoglycerate dehydrogenase                                              | 26  | 56614  | 1  | 1  |
| IPI00414860 | RPL37A 60S ribosomal protein L37a                                                     | 26  | 10268  | 1  | 1  |
| IPI00022694 | PSMD4 Isoform Rpl10A of 26S proteasome non-ATPase regulatory subunit 4                | 25  | 40711  | 1  | 1  |
| IPI00012750 | RPS25 40S ribosomal protein S25                                                       | 25  | 13734  | 2  | 2  |
| IPI00217985 | DOCK3 Dedicator of cytokinesis protein 3                                              | 25  | 232954 | 1  | 1  |
| IPI00064765 | RPL10L 60S ribosomal protein L10-like                                                 | 23  | 24503  | 1  | 1  |
| IPI01012677 | KIAA1211 cDNA FLJ60370, weakly similar to Homo sapiens retinitis pigmentosa G1        | 23  | 97460  | 1  | 1  |
| IPI00172636 | CAMK2D Isoform Delta 6 of Calcium/calmodulin-dependent protein kinase type II         | 22  | 54093  | 1  | 1  |
| IPI00186290 | EEF2 Elongation factor 2                                                              | 22  | 95277  | 1  | 1  |
| IPI00012535 | DNAJ1A DnaJ homolog subfamily A member 1                                              | 22  | 44839  | 1  | 1  |
| IPI00007935 | PDLIM5 Isoform 1 of PDZ and LIM domain protein 5                                      | 22  | 63904  | 1  | 1  |
| IPI00021266 | RPL23A;SNORD4A 60S ribosomal protein L23a                                             | 21  | 17684  | 1  | 1  |
| IPI00896367 | TBXA2R Uncharacterized protein                                                        | 21  | 26655  | 1  | 1  |
| IPI00064219 | NEURL4 Isoform 1 of Neuralized-like protein 4                                         | 20  | 166802 | 1  | 1  |
| IPI00382470 | HSP90AA1 Isoform 2 of Heat shock protein HSP 90-alpha                                 | 20  | 98099  | 1  | 1  |
| IPI00896542 | SPRED2 sprouty-related, EVH1 domain-containing protein 2 isoform b                    | 19  | 47002  | 1  | 1  |
| IPI00289799 | ZMIZ2 Isoform 2 of Zinc finger MIZ domain-containing protein 2                        | 19  | 93922  | 1  | 1  |
| IPI00300631 | SAFB Scaffold attachment factor B1                                                    | 18  | 102580 | 1  | 1  |
| IPI00216813 | ATXN7L2 Ataxin-7-like protein 2                                                       | 18  | 77132  | 1  | 1  |
| IPI00981973 | PKNOX1 Uncharacterized protein                                                        | 18  | 34498  | 1  | 1  |
| IPI00025039 | FBL rRNA 2'-O-methyltransferase fibrillar                                             | 17  | 33763  | 1  | 1  |
| IPI00479058 | RPS15 40S ribosomal protein S15                                                       | 17  | 17029  | 1  | 1  |
| IPI00005969 | CAPZA1 F-actin-capping protein subunit alpha-1                                        | 17  | 32902  | 1  | 1  |
| IPI00008708 | RSL1D1 Ribosomal L1 domain-containing protein 1                                       | 16  | 54939  | 1  | 1  |
| IPI00386170 | SSFA2 Isoform 3 of Sperm-specific antigen 2                                           | 15  | 137773 | 1  | 1  |
| IPI00065313 | TAF8 Isoform 2 of Transcription initiation factor TFIID subunit 8                     | 14  | 34414  | 1  | 1  |
| MYOCD       | IPI00743194 - Kappa light chain variable region (Fragment)                            | 580 | 13174  | 34 | 2  |
|             | IPI00305289 KIF11 Kinesin-like protein KIF11                                          | 523 | 119085 | 32 | 27 |
|             | IPI00021439 ACTB Actin, cytoplasmic 1                                                 | 381 | 41710  | 15 | 8  |
|             | IPI00829827 - 13 kDa protein                                                          | 296 | 13071  | 29 | 3  |
|             | IPI00031812 YBX1 Nuclease-sensitive element-binding protein 1                         | 225 | 35903  | 6  | 4  |
|             | IPI00163729 MKL1 MKL1 protein                                                         | 206 | 84994  | 11 | 10 |
|             | IPI00304925 HSPA1B;HSPA1A Heat shock 70 kDa protein 1A/1B                             | 203 | 70009  | 13 | 10 |
|             | IPI00013296 RPS18;RPS18P9 40S ribosomal protein S18                                   | 176 | 17708  | 8  | 7  |
|             | IPI00218055 MYOCD Isoform 1 of Myocardin                                              | 171 | 101934 | 11 | 9  |
|             | IPI00064328 PRMT5 protein arginine N-methyltransferase 5 isoform b                    | 165 | 71275  | 9  | 7  |
|             | IPI00026612 PPM1B Isoform Beta-1 of Protein phosphatase 1B                            | 163 | 52609  | 5  | 4  |
|             | IPI00012079 EIF4B Eukaryotic translation initiation factor 4B                         | 148 | 69110  | 6  | 6  |
|             | IPI00003865 HSPA8 Isoform 1 of Heat shock cognate 71 kDa protein                      | 146 | 70854  | 8  | 6  |
|             | IPI00217465 HIST1H1C Histone H1.2                                                     | 125 | 21352  | 5  | 5  |
|             | IPI00022434 ALB Uncharacterized protein                                               | 106 | 71658  | 6  | 2  |
|             | IPI00013881 HNRNPH1 Heterogeneous nuclear ribonucleoprotein H                         | 105 | 49198  | 2  | 1  |
|             | IPI00376798 RPL11 Isoform 1 of 60S ribosomal protein L11                              | 99  | 20240  | 2  | 1  |
|             | IPI00179709 TUBA3D;TUBA3C Isoform 1 of Tubulin alpha-3C/D chain                       | 99  | 49928  | 5  | 4  |
|             | IPI00183526 NCL Uncharacterized protein                                               | 95  | 50920  | 5  | 5  |
|             | IPI00410693 SERBP1 SERPINE1 mRNA binding protein 1, isoform CRA_d                     | 90  | 50890  | 2  | 2  |
|             | IPI00012202 WDR77 Methylosome protein 50                                              | 86  | 36701  | 3  | 3  |
|             | IPI00003881 HNRNPF Heterogeneous nuclear ribonucleoprotein F                          | 81  | 45643  | 1  | 1  |
|             | IPI00031801 CSDA Isoform 1 of DNA-binding protein A                                   | 77  | 40066  | 1  | 1  |
|             | IPI00106955 C11orf84 Uncharacterized protein C11orf84                                 | 77  | 41011  | 3  | 2  |
|             | IPI00021263 YWHAZ 14-3-3 protein zeta/delta                                           | 65  | 27728  | 2  | 2  |
|             | IPI00009379 IGHMBP2 DNA-binding protein SMUBP-2                                       | 64  | 109082 | 3  | 1  |
|             | IPI00410590 LSM14A Isoform 2 of Protein LSM14 homolog A                               | 62  | 50523  | 3  | 3  |
|             | IPI00301434 BOLA2B;BOLA2 Bo1A-like protein 2                                          | 61  | 16922  | 1  | 1  |
|             | IPI00012493 SNORD54;RPS20 40S ribosomal protein S20                                   | 60  | 13364  | 1  | 1  |
|             | IPI00004511 PPKFB3 Isoform 1 of 6-phosphofructo-2-kinase/fructose-2,6-biphosphatase 3 | 59  | 59571  | 1  | 1  |
|             | IPI00008868 MAP1B Microtubule-associated protein 1B                                   | 57  | 270468 | 2  | 1  |
|             | IPI00465361 RPL13 60S ribosomal protein L13                                           | 57  | 24247  | 1  | 1  |
|             | IPI00003362 HSPA5 78 kDa glucose-regulated protein                                    | 56  | 72288  | 3  | 3  |
|             | IPI00007765 HSPA9 Stress-70 protein, mitochondrial                                    | 56  | 73635  | 1  | 1  |
|             | IPI00007144 RPL26L1 60S ribosomal protein L26-like 1                                  | 56  | 17246  | 1  | 1  |
|             | IPI00012772 RPL8 60S ribosomal protein L8                                             | 56  | 28007  | 5  | 4  |
|             | IPI00003935 HIST2H2BE Histone H2B type 2-E                                            | 56  | 13912  | 3  | 2  |
|             | IPI00790342 RPL6 60S ribosomal protein L6                                             | 54  | 32871  | 2  | 2  |
|             | IPI00290791 CASP10 Isoform A of Caspase-10                                            | 52  | 58913  | 4  | 1  |
|             | IPI00027729 CSNK1E Casein kinase I isoform epsilon                                    | 51  | 47285  | 1  | 1  |
|             | IPI00007188 SLC25A5 ADP/ATP translocase 2                                             | 51  | 32831  | 2  | 2  |
|             | IPI00383808 - Ig Kappa chain V-IV region STH (Fragment)                               | 49  | 12053  | 1  | 1  |

|             |                                                                                 |    |        |   |   |
|-------------|---------------------------------------------------------------------------------|----|--------|---|---|
| IPI00215719 | RPL18 60S ribosomal protein L18                                                 | 48 | 21621  | 1 | 1 |
| IPI00375731 | RBM10 Isoform 1 of RNA-binding protein 10                                       | 47 | 103469 | 2 | 2 |
| IPI00008530 | RPLP0 60S acidic ribosomal protein P0                                           | 47 | 34252  | 2 | 1 |
| IPI00247583 | RPL21;SNORD102;SNORA27;RPL21P19 60S ribosomal protein L21                       | 47 | 18553  | 1 | 1 |
| IPI00784154 | HSPD1 60 kDa heat shock protein, mitochondrial                                  | 46 | 61016  | 1 | 1 |
| IPI00022694 | PSMD4 Isoform Rpn10A of 26S proteasome non-ATPase regulatory subunit 4          | 45 | 40711  | 2 | 2 |
| IPI01020995 | SCYL2 Uncharacterized protein                                                   | 45 | 77004  | 2 | 2 |
| IPI00004506 | KCTD5 BTB/POZ domain-containing protein KCTD5                                   | 45 | 26076  | 1 | 1 |
| IPI00396218 | SCYL2 SCY1-like protein 2                                                       | 44 | 103642 | 3 | 3 |
| IPI00026089 | SF3B1 Splicing factor 3B subunit 1                                              | 44 | 145738 | 1 | 1 |
| IPI00455348 | KCTD2 BTB/POZ domain-containing protein KCTD2                                   | 44 | 28509  | 1 | 1 |
| IPI00220528 | SNRPF Small nuclear ribonucleoprotein F                                         | 44 | 9719   | 1 | 1 |
| IPI00220740 | NPM1 Isoform 2 of Nucleophosmin                                                 | 43 | 29446  | 1 | 1 |
| IPI00215637 | DDX3X ATP-dependent RNA helicase DDX3X                                          | 41 | 73198  | 1 | 1 |
| IPI00216592 | HNRNPC Isoform C1 of Heterogeneous nuclear ribonucleoproteins C1/C2             | 41 | 32318  | 1 | 1 |
| IPI00221106 | SF3B2 Splicing factor 3B subunit 2                                              | 41 | 100165 | 2 | 2 |
| IPI00019580 | PLG Plasminogen                                                                 | 41 | 90510  | 1 | 1 |
| IPI00045109 | HIST1H2AA Histone H2A type 1-A                                                  | 39 | 14225  | 1 | 1 |
| IPI00554723 | SNORA70;RPL10 60S ribosomal protein L10                                         | 38 | 24588  | 2 | 2 |
| IPI00418471 | VIM Vimentin                                                                    | 38 | 53619  | 3 | 3 |
| IPI00219729 | SLC25A11 Mitochondrial 2-oxoglutarate/malate carrier protein                    | 37 | 34040  | 1 | 1 |
| IPI00215780 | RPS19 40S ribosomal protein S19                                                 | 37 | 16051  | 1 | 1 |
| IPI00161600 | C17orf79 Cooperator of PRMT5                                                    | 37 | 20054  | 2 | 1 |
| IPI00002127 | DNAH1 Isoform 2 of Dynein heavy chain 1, axonemal                               | 37 | 485611 | 1 | 1 |
| IPI00011253 | RPS3 40S ribosomal protein S3                                                   | 36 | 26671  | 2 | 2 |
| IPI00015963 | TRPA1 Transient receptor potential cation channel subfamily A member 1          | 35 | 127418 | 1 | 1 |
| IPI00470559 | KANK2 Isoform 1 of KN motif and ankyrin repeat domain-containing protein 2      | 34 | 91118  | 1 | 1 |
| IPI00022334 | OAT Ornithine aminotransferase, mitochondrial                                   | 34 | 48504  | 1 | 1 |
| IPI00008575 | KHDRBS1 Isoform 1 of KH domain-containing, RNA-binding, signal transduction-as- | 34 | 48197  | 1 | 1 |
| IPI01022997 | - Uncharacterized protein                                                       | 33 | 12936  | 1 | 1 |
| IPI00029731 | RPL35A 60S ribosomal protein L35a                                               | 33 | 12530  | 1 | 1 |
| IPI00026271 | RPS14 40S ribosomal protein S14                                                 | 33 | 16263  | 1 | 1 |
| IPI00000877 | HYOU1 Hypoxia up-regulated protein 1                                            | 33 | 111266 | 1 | 1 |
| IPI00219155 | RPL27 60S ribosomal protein L27                                                 | 32 | 15788  | 1 | 1 |
| IPI00004065 | ART4 Ecto-ADP-ribosyltransferase 4                                              | 32 | 35854  | 1 | 1 |
| IPI00008524 | PABPC1 Isoform 1 of Polyadenylate-binding protein 1                             | 32 | 70626  | 1 | 1 |
| IPI00299573 | RPL7A;SNORD24 60S ribosomal protein L7a                                         | 32 | 29977  | 1 | 1 |
| IPI00027235 | ATRNL1 Isoform 1 of Attractin                                                   | 31 | 158432 | 1 | 1 |
| IPI00044583 | TRERF1 Isoform 1 of Transcriptional-regulating factor 1                         | 31 | 132173 | 1 | 1 |
| IPI00412579 | RPL10A 60S ribosomal protein L10a                                               | 31 | 24816  | 1 | 1 |
| IPI00018971 | TRIM21 Isoform 1 of E3 ubiquitin-protein ligase TRIM21                          | 31 | 54135  | 2 | 2 |
| IPI00000001 | STAU1 Isoform Long of Double-stranded RNA-binding protein Staufen homolog 1     | 31 | 63143  | 1 | 1 |
| IPI00645452 | TUBB Uncharacterized protein                                                    | 31 | 47736  | 2 | 2 |
| IPI00179964 | PTBP1 Isoform 1 of Polypyrimidine tract-binding protein 1                       | 30 | 57186  | 1 | 1 |
| IPI00171903 | HNRNPM Isoform 1 of Heterogeneous nuclear ribonucleoprotein M                   | 30 | 77464  | 3 | 3 |
| IPI00304612 | SNORD32A;RPL13A;SNORD33;SNORD34 60S ribosomal protein L13a                      | 29 | 23562  | 1 | 1 |
| IPI00030131 | TMPO Isoform Beta of Lamina-associated polypeptide 2, isoforms beta/gamma       | 28 | 50639  | 1 | 1 |
| IPI00003406 | DBN1 Isoform 1 of Drebrin                                                       | 28 | 71385  | 1 | 1 |
| IPI00218064 | CLECL1 C-type lectin-like domain family 1                                       | 28 | 19103  | 1 | 1 |
| IPI00025239 | RPL19 60S ribosomal protein L19                                                 | 27 | 23451  | 1 | 1 |
| IPI00335641 | MKL2 cDNA FLJ61243, highly similar to MKL/myocardin-like protein 2              | 27 | 119092 | 2 | 2 |
| IPI01025580 | - Possible J 56 gene segment (Fragment)                                         | 27 | 2212   | 2 | 1 |
| IPI00221089 | RPS13 40S ribosomal protein S13                                                 | 26 | 17212  | 1 | 1 |
| IPI00306332 | RPL24 60S ribosomal protein L24                                                 | 26 | 17768  | 1 | 1 |
| IPI00759479 | IQSEC2 Isoform 1 of IQ motif and SEC7 domain-containing protein 2               | 26 | 161637 | 1 | 1 |
| IPI00217030 | RPS4X 40S ribosomal protein S4, X isoform                                       | 25 | 29579  | 1 | 1 |
| IPI00006079 | BCLAF1 Isoform 1 of Bcl-2-associated transcription factor 1                     | 25 | 106059 | 1 | 1 |
| IPI00651653 | DDX17 probable ATP-dependent RNA helicase DDX17 isoform 3                       | 24 | 80407  | 1 | 1 |
| IPI00964841 | APBB2 Protein                                                                   | 23 | 4656   | 1 | 1 |
| IPI00000959 | VIP Isoform 1 of VIP peptides                                                   | 23 | 19157  | 1 | 1 |
| IPI00217541 | DDX51 ATP-dependent RNA helicase DDX51                                          | 22 | 72413  | 1 | 1 |
| IPI00026328 | TXNDC12 Thioredoxin domain-containing protein 12                                | 21 | 19194  | 1 | 1 |
| IPI00024933 | RPL12 Isoform 1 of 60S ribosomal protein L12                                    | 20 | 17808  | 1 | 1 |
| IPI00735705 | LOC100128402 Similar to U1 small nuclear ribonucleoprotein C                    | 19 | 7380   | 1 | 1 |
| IPI00021924 | H1FX Histone H1x                                                                | 19 | 22474  | 1 | 1 |
| IPI00010153 | RPL23 60S ribosomal protein L23                                                 | 18 | 14856  | 1 | 1 |
| IPI00943803 | KIAA0913 Protein                                                                | 17 | 138703 | 1 | 1 |
| IPI00289499 | ATIC Bifunctional purine biosynthesis protein PURH                              | 17 | 64575  | 1 | 1 |
| IPI00186290 | EEF2 Elongation factor 2                                                        | 17 | 95277  | 1 | 1 |
| IPI00385236 | NTN4 Isoform 3 of Netrin-4                                                      | 17 | 66308  | 1 | 1 |
| IPI00163718 | VPS54 Isoform 4 of Vacuolar protein sorting-associated protein 54               | 16 | 109292 | 1 | 1 |
| IPI00000875 | EEF1G cDNA FLJ56389, highly similar to Elongation factor 1-gamma                | 15 | 56114  | 1 | 1 |
| IPI00171117 | COMMD1 COMM domain-containing protein 1                                         | 15 | 21165  | 1 | 1 |
| IPI00008708 | RSL1D1 Ribosomal L1 domain-containing protein 1                                 | 14 | 54939  | 1 | 1 |
| IPI00796239 | TNFRSF10B Uncharacterized protein                                               | 13 | 9382   | 1 | 1 |



Table 3: The clinical database is origin from UCSC Xena (<http://xena.ucsc.edu/compare-tissue/>). MYOCD expression was analyzed, the median value was chosen as a cutoff. Then analysis the percentage patients with low expression of MYOCD in patients with KRAS mutations.

| sample          | _study | _sample_type  | _primary_site | primary disease or tissue   | MYOCD expression | KRAS mutation |
|-----------------|--------|---------------|---------------|-----------------------------|------------------|---------------|
| TCGA-44-6146-01 | TCGA   | Primary Tumor | Lung          | Lung Adenocarcinoma         | 10.87            | KRAS          |
| TCGA-55-8207-01 | TCGA   | Primary Tumor | Lung          | Lung Adenocarcinoma         | 9.28             | KRAS          |
| TCGA-55-8097-01 | TCGA   | Primary Tumor | Lung          | Lung Adenocarcinoma         | 9.271            | KRAS          |
| TCGA-LA-A7SW-01 | TCGA   | Primary Tumor | Lung          | Lung Squamous Cell Carcinom | 8.944            | KRAS          |
| TCGA-73-7498-01 | TCGA   | Primary Tumor | Lung          | Lung Adenocarcinoma         | 8.691            | KRAS          |
| TCGA-97-8179-01 | TCGA   | Primary Tumor | Lung          | Lung Adenocarcinoma         | 8.503            | KRAS          |
| TCGA-78-7160-01 | TCGA   | Primary Tumor | Lung          | Lung Adenocarcinoma         | 8.1              | KRAS          |
| TCGA-97-A4M5-01 | TCGA   | Primary Tumor | Lung          | Lung Adenocarcinoma         | 7.756            | KRAS          |
| TCGA-NJ-A55R-01 | TCGA   | Primary Tumor | Lung          | Lung Adenocarcinoma         | 7.708            | KRAS          |
| TCGA-MP-A4TD-01 | TCGA   | Primary Tumor | Lung          | Lung Adenocarcinoma         | 7.692            | KRAS          |
| TCGA-55-8512-01 | TCGA   | Primary Tumor | Lung          | Lung Adenocarcinoma         | 7.659            | KRAS          |
| TCGA-MP-A4TI-01 | TCGA   | Primary Tumor | Lung          | Lung Adenocarcinoma         | 7.42             | KRAS          |
| TCGA-55-7284-01 | TCGA   | Primary Tumor | Lung          | Lung Adenocarcinoma         | 7.416            | KRAS          |
| TCGA-97-7941-01 | TCGA   | Primary Tumor | Lung          | Lung Adenocarcinoma         | 7.374            | KRAS          |
| TCGA-55-7728-01 | TCGA   | Primary Tumor | Lung          | Lung Adenocarcinoma         | 7.345            | KRAS          |
| TCGA-44-7671-01 | TCGA   | Primary Tumor | Lung          | Lung Adenocarcinoma         | 7.266            | KRAS          |
| TCGA-97-7938-01 | TCGA   | Primary Tumor | Lung          | Lung Adenocarcinoma         | 7.251            | KRAS          |
| TCGA-93-8067-01 | TCGA   | Primary Tumor | Lung          | Lung Adenocarcinoma         | 7.161            | KRAS          |
| TCGA-49-AARO-01 | TCGA   | Primary Tumor | Lung          | Lung Adenocarcinoma         | 7.123            | KRAS          |
| TCGA-95-A4VP-01 | TCGA   | Primary Tumor | Lung          | Lung Adenocarcinoma         | 7.116            | KRAS          |
| TCGA-50-8459-01 | TCGA   | Primary Tumor | Lung          | Lung Adenocarcinoma         | 6.99             | KRAS          |
| TCGA-49-4505-01 | TCGA   | Primary Tumor | Lung          | Lung Adenocarcinoma         | 6.968            | KRAS          |
| TCGA-55-7283-01 | TCGA   | Primary Tumor | Lung          | Lung Adenocarcinoma         | 6.955            | KRAS          |
| TCGA-75-7030-01 | TCGA   | Primary Tumor | Lung          | Lung Adenocarcinoma         | 6.931            | KRAS          |
| TCGA-55-6975-01 | TCGA   | Primary Tumor | Lung          | Lung Adenocarcinoma         | 6.923            | KRAS          |
| TCGA-55-1595-01 | TCGA   | Primary Tumor | Lung          | Lung Adenocarcinoma         | 6.92             | KRAS          |
| TCGA-35-3615-01 | TCGA   | Primary Tumor | Lung          | Lung Adenocarcinoma         | 6.9              | KRAS          |
| TCGA-05-4417-01 | TCGA   | Primary Tumor | Lung          | Lung Adenocarcinoma         | 6.85             | KRAS          |
| TCGA-69-8253-01 | TCGA   | Primary Tumor | Lung          | Lung Adenocarcinoma         | 6.799            | KRAS          |
| TCGA-75-7027-01 | TCGA   | Primary Tumor | Lung          | Lung Adenocarcinoma         | 6.75             | KRAS          |
| TCGA-69-8254-01 | TCGA   | Primary Tumor | Lung          | Lung Adenocarcinoma         | 6.709            | KRAS          |
| TCGA-L9-A443-01 | TCGA   | Primary Tumor | Lung          | Lung Adenocarcinoma         | 6.678            | KRAS          |
| TCGA-62-A46S-01 | TCGA   | Primary Tumor | Lung          | Lung Adenocarcinoma         | 6.637            | KRAS          |

|                 |      |               |      |                     |       |      |            |
|-----------------|------|---------------|------|---------------------|-------|------|------------|
| TCGA-78-7540-01 | TCGA | Primary Tumor | Lung | Lung Adenocarcinoma | 6.626 | KRAS |            |
| TCGA-05-4433-01 | TCGA | Primary Tumor | Lung | Lung Adenocarcinoma | 6.541 | KRAS |            |
| TCGA-55-6983-01 | TCGA | Primary Tumor | Lung | Lung Adenocarcinoma | 6.498 | KRAS |            |
| TCGA-MP-A4TK-01 | TCGA | Primary Tumor | Lung | Lung Adenocarcinoma | 6.446 | KRAS |            |
| TCGA-93-7347-01 | TCGA | Primary Tumor | Lung | Lung Adenocarcinoma | 6.413 | KRAS |            |
| TCGA-49-4510-01 | TCGA | Primary Tumor | Lung | Lung Adenocarcinoma | 6.385 | KRAS |            |
| TCGA-95-A4VK-01 | TCGA | Primary Tumor | Lung | Lung Adenocarcinoma | 6.348 | KRAS |            |
| TCGA-69-7980-01 | TCGA | Primary Tumor | Lung | Lung Adenocarcinoma | 6.297 | KRAS |            |
| TCGA-67-3774-01 | TCGA | Primary Tumor | Lung | Lung Adenocarcinoma | 6.296 | KRAS |            |
| TCGA-78-7167-01 | TCGA | Primary Tumor | Lung | Lung Adenocarcinoma | 6.266 | KRAS |            |
| TCGA-44-7661-01 | TCGA | Primary Tumor | Lung | Lung Adenocarcinoma | 6.265 | KRAS |            |
| TCGA-86-8359-01 | TCGA | Primary Tumor | Lung | Lung Adenocarcinoma | 6.25  | KRAS |            |
| TCGA-99-8025-01 | TCGA | Primary Tumor | Lung | Lung Adenocarcinoma | 6.239 | KRAS |            |
| TCGA-67-4679-01 | TCGA | Primary Tumor | Lung | Lung Adenocarcinoma | 6.218 | KRAS |            |
| TCGA-78-7145-01 | TCGA | Primary Tumor | Lung | Lung Adenocarcinoma | 6.208 | KRAS |            |
| TCGA-69-7978-01 | TCGA | Primary Tumor | Lung | Lung Adenocarcinoma | 6.136 | KRAS |            |
| TCGA-44-6776-01 | TCGA | Primary Tumor | Lung | Lung Adenocarcinoma | 6.073 | KRAS |            |
| TCGA-78-7161-01 | TCGA | Primary Tumor | Lung | Lung Adenocarcinoma | 6.069 | KRAS |            |
| TCGA-55-8508-01 | TCGA | Primary Tumor | Lung | Lung Adenocarcinoma | 6.065 | KRAS |            |
| TCGA-55-8090-01 | TCGA | Primary Tumor | Lung | Lung Adenocarcinoma | 6.049 | KRAS | MYOCD high |
| TCGA-78-7166-01 | TCGA | Primary Tumor | Lung | Lung Adenocarcinoma | 6.023 | KRAS | expression |
| TCGA-75-6206-01 | TCGA | Primary Tumor | Lung | Lung Adenocarcinoma | 6.014 | KRAS |            |
| TCGA-86-A456-01 | TCGA | Primary Tumor | Lung | Lung Adenocarcinoma | 5.999 | KRAS |            |
| TCGA-95-7039-01 | TCGA | Primary Tumor | Lung | Lung Adenocarcinoma | 5.976 | KRAS |            |
| TCGA-97-7554-01 | TCGA | Primary Tumor | Lung | Lung Adenocarcinoma | 5.966 | KRAS |            |
| TCGA-MP-A4SY-01 | TCGA | Primary Tumor | Lung | Lung Adenocarcinoma | 5.965 | KRAS |            |
| TCGA-55-7281-01 | TCGA | Primary Tumor | Lung | Lung Adenocarcinoma | 5.845 | KRAS |            |
| TCGA-44-6145-01 | TCGA | Primary Tumor | Lung | Lung Adenocarcinoma | 5.837 | KRAS |            |
| TCGA-J2-A4AG-01 | TCGA | Primary Tumor | Lung | Lung Adenocarcinoma | 5.805 | KRAS |            |
| TCGA-69-7974-01 | TCGA | Primary Tumor | Lung | Lung Adenocarcinoma | 5.735 | KRAS |            |
| TCGA-50-5051-01 | TCGA | Primary Tumor | Lung | Lung Adenocarcinoma | 5.73  | KRAS |            |
| TCGA-55-7576-01 | TCGA | Primary Tumor | Lung | Lung Adenocarcinoma | 5.674 | KRAS |            |
| TCGA-55-7907-01 | TCGA | Primary Tumor | Lung | Lung Adenocarcinoma | 5.661 | KRAS |            |
| TCGA-NJ-A55O-01 | TCGA | Primary Tumor | Lung | Lung Adenocarcinoma | 5.583 | KRAS |            |
| TCGA-93-A4JO-01 | TCGA | Primary Tumor | Lung | Lung Adenocarcinoma | 5.564 | KRAS |            |
| TCGA-55-7910-01 | TCGA | Primary Tumor | Lung | Lung Adenocarcinoma | 5.542 | KRAS |            |
| TCGA-99-8032-01 | TCGA | Primary Tumor | Lung | Lung Adenocarcinoma | 5.54  | KRAS |            |
| TCGA-55-8299-01 | TCGA | Primary Tumor | Lung | Lung Adenocarcinoma | 5.478 | KRAS |            |
| TCGA-99-8028-01 | TCGA | Primary Tumor | Lung | Lung Adenocarcinoma | 5.47  | KRAS |            |

|                 |      |               |      |                             |       |      |
|-----------------|------|---------------|------|-----------------------------|-------|------|
| TCGA-50-5932-01 | TCGA | Primary Tumor | Lung | Lung Adenocarcinoma         | 5.468 | KRAS |
| TCGA-21-1078-01 | TCGA | Primary Tumor | Lung | Lung Squamous Cell Carcinom | 5.429 | KRAS |
| TCGA-86-8076-01 | TCGA | Primary Tumor | Lung | Lung Adenocarcinoma         | 5.427 | KRAS |
| TCGA-55-6970-01 | TCGA | Primary Tumor | Lung | Lung Adenocarcinoma         | 5.363 | KRAS |
| TCGA-44-8117-01 | TCGA | Primary Tumor | Lung | Lung Adenocarcinoma         | 5.357 | KRAS |
| TCGA-55-8203-01 | TCGA | Primary Tumor | Lung | Lung Adenocarcinoma         | 5.334 | KRAS |
| TCGA-55-6642-01 | TCGA | Primary Tumor | Lung | Lung Adenocarcinoma         | 5.274 | KRAS |
| TCGA-MP-A4T4-01 | TCGA | Primary Tumor | Lung | Lung Adenocarcinoma         | 5.251 | KRAS |
| TCGA-97-8176-01 | TCGA | Primary Tumor | Lung | Lung Adenocarcinoma         | 5.22  | KRAS |
| TCGA-44-7672-01 | TCGA | Primary Tumor | Lung | Lung Adenocarcinoma         | 5.174 | KRAS |
| TCGA-80-5608-01 | TCGA | Primary Tumor | Lung | Lung Adenocarcinoma         | 5.122 | KRAS |
| TCGA-73-4662-01 | TCGA | Primary Tumor | Lung | Lung Adenocarcinoma         | 5.104 | KRAS |
| TCGA-63-6202-01 | TCGA | Primary Tumor | Lung | Lung Squamous Cell Carcinom | 5.076 | KRAS |
| TCGA-91-6828-01 | TCGA | Primary Tumor | Lung | Lung Adenocarcinoma         | 5.065 | KRAS |
| TCGA-91-6849-01 | TCGA | Primary Tumor | Lung | Lung Adenocarcinoma         | 5.041 | KRAS |
| TCGA-55-8514-01 | TCGA | Primary Tumor | Lung | Lung Adenocarcinoma         | 5.04  | KRAS |
| TCGA-05-4415-01 | TCGA | Primary Tumor | Lung | Lung Adenocarcinoma         | 5.03  | KRAS |
| TCGA-50-5941-01 | TCGA | Primary Tumor | Lung | Lung Adenocarcinoma         | 5.004 | KRAS |
| TCGA-50-5936-01 | TCGA | Primary Tumor | Lung | Lung Adenocarcinoma         | 4.973 | KRAS |
| TCGA-55-6984-01 | TCGA | Primary Tumor | Lung | Lung Adenocarcinoma         | 4.953 | KRAS |
| TCGA-97-A4M0-01 | TCGA | Primary Tumor | Lung | Lung Adenocarcinoma         | 4.932 | KRAS |
| TCGA-05-4244-01 | TCGA | Primary Tumor | Lung | Lung Adenocarcinoma         | 4.926 | KRAS |
| TCGA-75-5126-01 | TCGA | Primary Tumor | Lung | Lung Adenocarcinoma         | 4.897 | KRAS |
| TCGA-44-A47A-01 | TCGA | Primary Tumor | Lung | Lung Adenocarcinoma         | 4.893 | KRAS |
| TCGA-83-5908-01 | TCGA | Primary Tumor | Lung | Lung Adenocarcinoma         | 4.78  | KRAS |
| TCGA-78-7148-01 | TCGA | Primary Tumor | Lung | Lung Adenocarcinoma         | 4.756 | KRAS |
| TCGA-55-7726-01 | TCGA | Primary Tumor | Lung | Lung Adenocarcinoma         | 4.744 | KRAS |
| TCGA-J2-8194-01 | TCGA | Primary Tumor | Lung | Lung Adenocarcinoma         | 4.662 | KRAS |
| TCGA-NJ-A4YG-01 | TCGA | Primary Tumor | Lung | Lung Adenocarcinoma         | 4.656 | KRAS |
| TCGA-99-8033-01 | TCGA | Primary Tumor | Lung | Lung Adenocarcinoma         | 4.643 | KRAS |
| TCGA-MN-A4N5-01 | TCGA | Primary Tumor | Lung | Lung Adenocarcinoma         | 4.515 | KRAS |
| TCGA-86-7953-01 | TCGA | Primary Tumor | Lung | Lung Adenocarcinoma         | 4.481 | KRAS |
| TCGA-55-8616-01 | TCGA | Primary Tumor | Lung | Lung Adenocarcinoma         | 4.462 | KRAS |
| TCGA-95-A4VN-01 | TCGA | Primary Tumor | Lung | Lung Adenocarcinoma         | 4.434 | KRAS |
| TCGA-44-3917-01 | TCGA | Primary Tumor | Lung | Lung Adenocarcinoma         | 4.407 | KRAS |
| TCGA-62-8398-01 | TCGA | Primary Tumor | Lung | Lung Adenocarcinoma         | 4.407 | KRAS |
| TCGA-62-A46R-01 | TCGA | Primary Tumor | Lung | Lung Adenocarcinoma         | 4.381 | KRAS |
| TCGA-55-7725-01 | TCGA | Primary Tumor | Lung | Lung Adenocarcinoma         | 4.358 | KRAS |
| TCGA-73-4670-01 | TCGA | Primary Tumor | Lung | Lung Adenocarcinoma         | 4.327 | KRAS |

|                 |      |               |      |                             |       |      |                      |
|-----------------|------|---------------|------|-----------------------------|-------|------|----------------------|
| TCGA-55-8302-01 | TCGA | Primary Tumor | Lung | Lung Adenocarcinoma         | 4.317 | KRAS |                      |
| TCGA-69-7973-01 | TCGA | Primary Tumor | Lung | Lung Adenocarcinoma         | 4.317 | KRAS |                      |
| TCGA-86-A4JF-01 | TCGA | Primary Tumor | Lung | Lung Adenocarcinoma         | 4.286 | KRAS |                      |
| TCGA-MP-A4T7-01 | TCGA | Primary Tumor | Lung | Lung Adenocarcinoma         | 4.284 | KRAS |                      |
| TCGA-73-4677-01 | TCGA | Primary Tumor | Lung | Lung Adenocarcinoma         | 4.233 | KRAS |                      |
| TCGA-78-8655-01 | TCGA | Primary Tumor | Lung | Lung Adenocarcinoma         | 4.138 | KRAS |                      |
| TCGA-78-7539-01 | TCGA | Primary Tumor | Lung | Lung Adenocarcinoma         | 4.108 | KRAS |                      |
| TCGA-MP-A4T8-01 | TCGA | Primary Tumor | Lung | Lung Adenocarcinoma         | 4.028 | KRAS |                      |
| TCGA-64-5775-01 | TCGA | Primary Tumor | Lung | Lung Adenocarcinoma         | 4.014 | KRAS |                      |
| TCGA-05-4427-01 | TCGA | Primary Tumor | Lung | Lung Adenocarcinoma         | 3.999 | KRAS |                      |
| TCGA-05-4250-01 | TCGA | Primary Tumor | Lung | Lung Adenocarcinoma         | 3.973 | KRAS |                      |
| TCGA-86-8674-01 | TCGA | Primary Tumor | Lung | Lung Adenocarcinoma         | 3.903 | KRAS |                      |
| TCGA-67-3773-01 | TCGA | Primary Tumor | Lung | Lung Adenocarcinoma         | 3.897 | KRAS |                      |
| TCGA-55-7914-01 | TCGA | Primary Tumor | Lung | Lung Adenocarcinoma         | 3.876 | KRAS |                      |
| TCGA-05-4418-01 | TCGA | Primary Tumor | Lung | Lung Adenocarcinoma         | 3.691 | KRAS |                      |
| TCGA-MP-A4TF-01 | TCGA | Primary Tumor | Lung | Lung Adenocarcinoma         | 3.583 | KRAS |                      |
| TCGA-86-7713-01 | TCGA | Primary Tumor | Lung | Lung Adenocarcinoma         | 3.526 | KRAS |                      |
| TCGA-64-5815-01 | TCGA | Primary Tumor | Lung | Lung Adenocarcinoma         | 3.509 | KRAS |                      |
| TCGA-66-2769-01 | TCGA | Primary Tumor | Lung | Lung Squamous Cell Carcinom | 3.496 | KRAS |                      |
| TCGA-21-5783-01 | TCGA | Primary Tumor | Lung | Lung Squamous Cell Carcinom | 3.395 | KRAS | MYOCD low expression |
| TCGA-55-7911-01 | TCGA | Primary Tumor | Lung | Lung Adenocarcinoma         | 3.374 | KRAS |                      |
| TCGA-NJ-A4YI-01 | TCGA | Primary Tumor | Lung | Lung Adenocarcinoma         | 3.33  | KRAS |                      |
| TCGA-05-4395-01 | TCGA | Primary Tumor | Lung | Lung Adenocarcinoma         | 3.314 | KRAS |                      |
| TCGA-95-7567-01 | TCGA | Primary Tumor | Lung | Lung Adenocarcinoma         | 3.251 | KRAS |                      |
| TCGA-55-A490-01 | TCGA | Primary Tumor | Lung | Lung Adenocarcinoma         | 3.209 | KRAS |                      |
| TCGA-52-7812-01 | TCGA | Primary Tumor | Lung | Lung Squamous Cell Carcinom | 3.183 | KRAS |                      |
| TCGA-05-4390-01 | TCGA | Primary Tumor | Lung | Lung Adenocarcinoma         | 3.114 | KRAS |                      |
| TCGA-95-7562-01 | TCGA | Primary Tumor | Lung | Lung Adenocarcinoma         | 3.081 | KRAS |                      |
| TCGA-MP-A4TE-01 | TCGA | Primary Tumor | Lung | Lung Adenocarcinoma         | 2.941 | KRAS |                      |
| TCGA-86-8054-01 | TCGA | Primary Tumor | Lung | Lung Adenocarcinoma         | 2.934 | KRAS |                      |
| TCGA-4B-A93V-01 | TCGA | Primary Tumor | Lung | Lung Adenocarcinoma         | 2.82  | KRAS |                      |
| TCGA-64-5774-01 | TCGA | Primary Tumor | Lung | Lung Adenocarcinoma         | 2.791 | KRAS |                      |
| TCGA-55-7815-01 | TCGA | Primary Tumor | Lung | Lung Adenocarcinoma         | 2.718 | KRAS |                      |
| TCGA-55-8615-01 | TCGA | Primary Tumor | Lung | Lung Adenocarcinoma         | 2.683 | KRAS |                      |
| TCGA-53-7813-01 | TCGA | Primary Tumor | Lung | Lung Adenocarcinoma         | 2.448 | KRAS |                      |
| TCGA-64-5778-01 | TCGA | Primary Tumor | Lung | Lung Adenocarcinoma         | 2.374 | KRAS |                      |
| TCGA-NJ-A4YP-01 | TCGA | Primary Tumor | Lung | Lung Adenocarcinoma         | 2.337 | KRAS |                      |
| TCGA-43-2581-01 | TCGA | Primary Tumor | Lung | Lung Squamous Cell Carcinom | 2.274 | KRAS |                      |
| TCGA-55-A494-01 | TCGA | Primary Tumor | Lung | Lung Adenocarcinoma         | 1.982 | KRAS |                      |

|                 |      |               |      |                             |        |      |
|-----------------|------|---------------|------|-----------------------------|--------|------|
| TCGA-O2-A52Q-01 | TCGA | Primary Tumor | Lung | Lung Squamous Cell Carcinom | 1.781  | KRAS |
| TCGA-91-6836-01 | TCGA | Primary Tumor | Lung | Lung Adenocarcinoma         | 1.721  | KRAS |
| TCGA-55-8094-01 | TCGA | Primary Tumor | Lung | Lung Adenocarcinoma         | 1.592  | KRAS |
| TCGA-49-AARQ-01 | TCGA | Primary Tumor | Lung | Lung Adenocarcinoma         | 0.9279 | KRAS |
| TCGA-49-4506-01 | TCGA | Primary Tumor | Lung | Lung Adenocarcinoma         | 0.7484 | KRAS |
| TCGA-MF-A522-01 | TCGA | Primary Tumor | Lung | Lung Squamous Cell Carcinom | 0      | KRAS |

The clinical database is origin from UCSC Xena (<http://xena.ucsc.edu/compare-tissue/>).

MYOCD expression was analyzed, the median value was chosen as a cutoff.

Then analysis the percentage patients with low expression of MYOCD in patients with KRAS mutations.
